# Supplementary material
Source: PubMed Central journal article supplement (PMC4746018)
Supplement: NIHMS734224-supplement-01.pdf [file NIHMS734224-supplement-01.pdf]

**Online Supplemental Table.** Theory of Planned Behavior mean scores<sup>a</sup> and standard deviations (SD) for adolescents and parents overall, adolescents by last grade completed (i.e. middle school or high school), and parents by BMI category from a Mixed Methods Analysis of Beverage Choices in Adolescents and Parents using the Theory of Planned Behavior.

|                                     | <b>Adolescents<br/>(N=100)</b> |                          | <b>Parents<br/>(N=66)</b> |                          |
|-------------------------------------|--------------------------------|--------------------------|---------------------------|--------------------------|
| <b>Attitude</b>                     | <b>Overall</b>                 | <b>3.44 (0.57)</b>       | <b>Overall</b>            | <b>4.85 (1.29)</b>       |
|                                     | Middle school                  | 3.30 (0.50) <sup>b</sup> | Underweight               | 5.29 (1.02)              |
|                                     | High school                    | 3.63 (0.61) <sup>b</sup> | Normal weight             | 5.02 (1.53)              |
|                                     |                                |                          | Overweight                | 4.46 (0.96)              |
|                                     |                                |                          | Obese                     | 4.87 (1.16)              |
| <b>Subjective norm</b>              | <b>Overall</b>                 | <b>3.59 (0.74)</b>       | <b>Overall</b>            | <b>4.56 (1.18)</b>       |
|                                     | Middle school                  | 3.59 (0.74)              | Underweight               | 4.92 (1.20)              |
|                                     | High school                    | 3.60 (0.74)              | Normal weight             | 4.59 (1.29)              |
|                                     |                                |                          | Overweight                | 4.56 (1.04)              |
|                                     |                                |                          | Obese                     | 4.43 (1.23)              |
| <b>Perceived behavioral control</b> | <b>Overall</b>                 | <b>4.48 (0.61)</b>       | <b>Overall</b>            | <b>6.52 (0.65)</b>       |
|                                     | Middle school                  | 4.34 (0.60) <sup>b</sup> | Underweight               | 6.17 (1.00)              |
|                                     | High school                    | 4.66 (0.58) <sup>b</sup> | Normal weight             | 6.78 (0.47) <sup>c</sup> |
|                                     |                                |                          | Overweight                | 6.54 (0.64)              |
|                                     |                                |                          | Obese                     | 6.07 (0.64) <sup>c</sup> |

| <b>Intention</b> | <b>Overall</b> | <b>3.45 (0.85)</b> | <b>Overall</b> | <b>5.69 (1.73)</b> |
|------------------|----------------|--------------------|----------------|--------------------|
|                  | Middle school  | 3.34 (0.87)        | Underweight    | 5.69 (2.63)        |
|                  | High school    | 3.60 (0.80)        | Normal weight  | 6.16 (1.37)        |
|                  |                |                    | Overweight     | 5.43 (1.83)        |
|                  |                |                    | Obese          | 5.04 (1.90)        |

<sup>a</sup>Responses to the Theory of Planned Behavior Questionnaire were scored using a seven-point semantic differential scale in parents (i.e. "1" to "7") and a five-point semantic differential scale in adolescents (i.e. "1" to "5").

<sup>b</sup>Significantly different responses between middle school and high school participants,  $p < 0.01$

<sup>c</sup>Significantly different responses between normal weight and obese parents,  $p < 0.01$
